# Supplementary material
Source: PubMed Central journal article supplement (PMC4352598)

## Supplemental Material

Christian A. Fernandez,<sup>1</sup> Colton Smith,<sup>1</sup> Seth E. Karol,<sup>1,2</sup> Laura B. Ramsey,<sup>1</sup> Chengcheng Liu,<sup>1</sup> Ching-Hon Pui,<sup>2</sup> Sima Jeha,<sup>2</sup> William E. Evans,<sup>1</sup> Fred D. Finkelman,<sup>3</sup> and Mary V. Relling<sup>1</sup>

<sup>1</sup>Department of Pharmaceutical Sciences, St. Jude Children's Research Hospital, 262 Danny Thomas Place, Memphis, TN 38105, USA; <sup>2</sup>Department of Oncology, St. Jude Children's Research Hospital, 262 Danny Thomas Place, Memphis, TN 38105, USA; <sup>3</sup>Department of Medicine, Cincinnati Veterans Affairs Medical Center; the Department of Internal Medicine, Division of Immunology, Allergy and Rheumatology, University of Cincinnati College of Medicine; and the Division of Immunobiology, Cincinnati Children's Hospital Medical Center, Cincinnati, OH 45267, USA.

Number of supplemental figures: 2

## Supplemental Figure Legends

**Supplemental Figure 1. Anti-asparaginase IgG antibodies neutralize *ex vivo* asparaginase activity.** Asparaginase was added to samples from non-sensitized mice, sensitized mice, or to samples from non-sensitized mice with added rabbit anti-asparaginase IgG antibodies (5  $\mu\text{g}/\mu\text{L}$ ) and tested for residual asparaginase activity. (A) Compared to non-sensitized mice, samples from sensitized mice neutralized > 30% of the *ex vivo* asparaginase activity. (B) The magnitude of asparaginase activity inhibition was correlated with antibody levels ( $R^2 = 0.161$ ,  $P = 0.04$ ), suggesting that enzyme activity neutralization is partly dependent on the antibody levels.

**Supplemental Figure 2. Pretreatment with antihistamine, CV-6209, or dexamethasone has no influence on asparaginase activity in non-sensitized mice.** Non-sensitized mice received no pretreatment or pretreatment with antihistamine (triprolidine and cimetidine), CV-6209, or dexamethasone. The pretreatment had no influence on the asparaginase activity measured *in vivo* ( $P > 0.05$  for all).

Supplemental Figure 1.

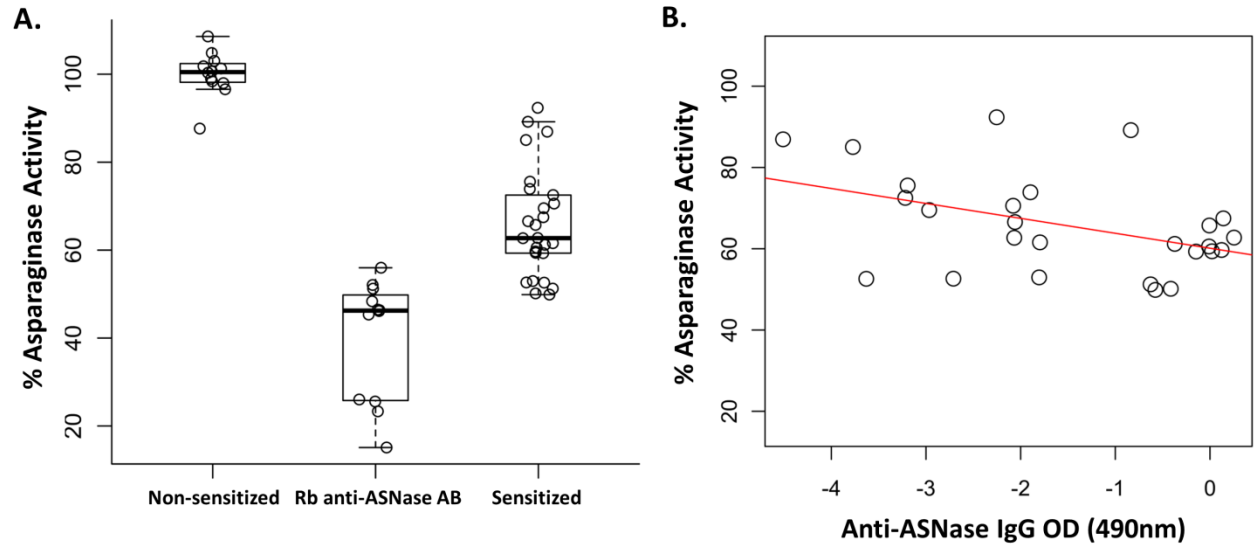

Supplemental Figure 2.

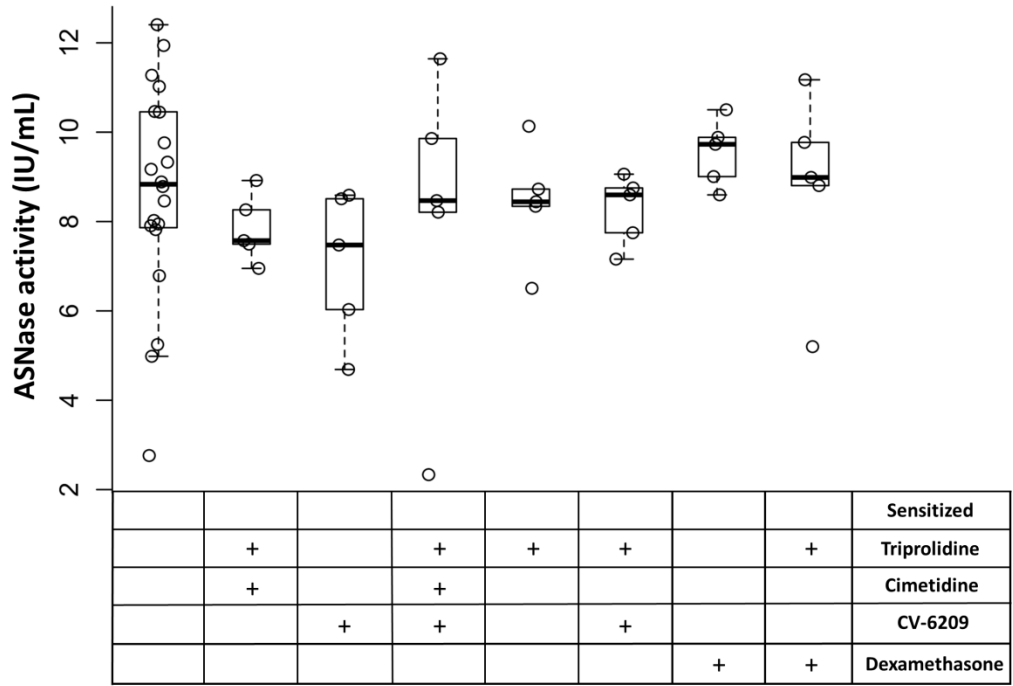

Supplement: supp_114.220780_jpet220780_suppl_figs.pdf [file supp_114.220780_jpet220780_suppl_figs.pdf]
